# Supplementary material
Source: publisher site journal article supplement (https://www.dovepress.com/article/394092)
Supplement: Supplementary file 1 [file get_supplementary_file.php]

**Supplementary Table**: List of all detected pathogenic variants

| **Gene** | **Exon/Intron** | **nucleotide change** | **Amino acid change** | **Variant type** | **Frequency** |
| --- | --- | --- | --- | --- | --- |
| APC | Exon 16 | c.3920T>A | p.Ile1307Lys | Missense | 19 |
| ATM | Exon 13 | c.2064del | p.Glu688Aspfs*15 | Deletion/fs | 1 |
| ATM | Exon 15 | c.2284_2285del | p.Leu762Valfs*2 | Deletion/fs | 1 |
| ATM | Exon 37 | c.5644C>T | p.Arg1882* | Nonsense | 1 |
| ATM | Exon 42 | c.6188G>A | p.Gly2063Glu | Missense | 1 |
| ATM | Exon 52 | c.7788G>A | p.Glu2596= | synonymous | 1 |
| ATM | Exon 56 | c.8185C>T | p.Gln2729* | Nonsense | 1 |
| ATM | Exon23 | c.3292del | Gln1098Argfs*11 | Deletion/fs | 1 |
| ATM | Intron 18 | c.2839-579_2839-576del | NA | Intron Variant-del | 1 |
| BARD1 | Exon 3 | c.334C>T | p.Arg112* | Nonsense | 1 |
| BRCA1 | (Exons 1-2) | Deletion (Exons 1-2) | NA | Gross deletion | 5 |
| BRCA1 | Exon 10 | c.2172_2173ins? | p.Ser725fs | Insertion/fs | 1 |
| BRCA1 | Exon 10 | c.2572C>T | p.Gln858* | Nonsense | 1 |
| BRCA1 | Exon 10 | c.2635G>T | p.Glu879* | Nonsense | 1 |
| BRCA1 | Exon 10 | c.3331_3334del | p.Gln1111Asnfs*5 | Deletion/fs | 2 |
| BRCA1 | Exon 10 | c.3756_3759del | p.Ser1253Argfs*10 | Deletion/fs | 1 |
| BRCA1 | Exon 10 | c.3770_3771del | p.Glu1257Glyfs*9 | Deletion/fs | 1 |
| BRCA1 | Exon 10 | c.4065_4068del | p.Asn1355Lysfs*10 | Deletion/fs | 1 |
| BRCA1 | Exon 10 | c.981del | p.Cys328Valfs*13 | Deletion/fs | 1 |
| BRCA1 | Exon 11 | c.4117G>T | p.Glu1373* | Nonsense | 1 |
| BRCA1 | Exon 14 | c.4524G>A | p.Trp1508* | Nonsense | 1 |
| BRCA1 | Exon 17 | c.5090G>A | p.Cys1697Tyr | Missense | 2 |
| BRCA1 | Exon 18 | c.5161C>T | p.Gln1721* | Nonsense | 2 |
| BRCA1 | Exon 18 | c.5173G>T | p.Glu1725* | Nonsense | 1 |
| BRCA1 | Exon 19 | c.5266dup | p.Gln1756Profs | Duplication/fs | 1 |
| BRCA1 | Exon 2 | c.66dup | p.Glu23Argfs | Duplication/fs | 1 |
| BRCA1 | Exon 22 | c.5444G>A | p.Trp1815Ter | Nonsense | 4 |
| BRCA1 | Exon 3 | c.121C>T | p.His41Tyr | Missense | 2 |
| BRCA1 | Exon 5 | c.250G>T | p.Glu84* | Nonsense | 1 |
| BRCA1 | Intron 16 | c.5074+3A>G | NA | Intron Variant | 5 |
| BRCA1 | Intron 9 | c.671-1G>T | NA | Splice acceptor | 1 |
| BRCA2 | Exon 10 | c.1796_1800del | Ser599* | Nonsense | 1 |
| BRCA2 | Exon 11 | c.2254_2257del | p.Asp752Phefs*19) | Deletion/fs | 12 |
| BRCA2 | Exon 11/Exon11 | c.2254_2257del &c.5351dup | p.Asp752Phefs & p.Asn1784Lysfs | Deletion/fs-Duplication/fs | 5 |
| BRCA2 | Exon 11 | c.2808_2811del | p.Ala938Profs*2 | Deletion/fs | 2 |
| BRCA2 | Exon 11 | c.3847_3848del | p.Val1283Lysfs*2 | Deletion/fs | 2 |
| BRCA2 | Exon 11 | c.5557dup | p.Cys1853Leufs*5 | Duplication/fs | 2 |
| BRCA2 | Exon 11 | c.5909_5913del | p.Ser1970Cysfs*8 | Deletion/fs | 1 |
| BRCA2 | Exon 11 | c.6124C>T | p.Gln2042* | Nonsense | 1 |
| BRCA2 | Exon 11 | c.6405_6409del | p.Asn2135Lysfs*3 | Deletion/fs | 1 |
| BRCA2 | Exon 11 | c.6486del | p.Lys2162Asnfs*6 | Deletion/fs | 1 |
| BRCA2 | Exon 11 | c.6634_6637del | p.Cys2212Leufs*16 | Deletion/fs | 2 |
| BRCA2 | Exon 11 | c.6685G>T | p.Glu2229* | Nonsense | 1 |
| BRCA2 | Exon 11 | c.4222_4223del | p.Gln1408Valfs*5 | Deletion/fs | 1 |
| BRCA2 | Exon 15 | c.7480C>T | p.Arg2494* | Nonsense | 1 |
| BRCA2 | Exon 18 | c.8023A>G | p.Ile2675Val | Missense | 1 |
| BRCA2 | Exon 18 | c.8140C>T | p.Gln2714* | Nonsense | 2 |
| BRCA2 | Exon 18 | c.8168A>G | p.Asp2723Gly | Missense | 1 |
| BRCA2 | Exon 19 | c.8486A>T | p.Gln2829Leu | Missense | 1 |
| BRCA2 | Exon 22 | c.8760T>G | p.Tyr2920* | Nonsense | 2 |
| BRCA2 | Exon 22 | c.8857G>T | p.Glu2953* | Nonsense | 1 |
| BRCA2 | Exon 23 | c.9028_9029insTTCC | p.His3010Leufs*9 | Insertion/fs | 1 |
| BRCA2 | Exon 24 | c.9200_9201insCT | p.Ser3068Tyrfs*8 | Insertion/fs | 1 |
| BRCA2 | Exon 25 | c.9382C>T | p.Arg3128* | Nonsense | 1 |
| BRCA2 | Exon 3 | c.289G>T | p.Glu97* | Nonsense | 1 |
| BRCA2 | Exon 3 | Exon 3 Deletion | NA | Gross deletion | 1 |
| BRCA2 | Exons 5-11  (3 copies) | Partial Duplication  (Exons 5-11) | NA | Gross duplication | 5 |
| BRCA2 | Intron 23 | c.9118-1G>A | NA | Splice acceptor | 1 |
| BRCA2 | Intron 24 | c.9257-1G>A | NA | Splice acceptor | 1 |
| BRIP1 | Exon 20 | c.2947del | p.Ile983Leufs*2 | Deletion/fs | 1 |
| BRIP1 | Exon 4 | c.247C>T | p.Gln83* | Nonsense | 1 |
| BRIP1 | Exon 8 | c.1126C>T | p.Gln376* | Nonsense | 1 |
| BRIP1 | Intron 17 | c.2492+2T>C | NA | Splice donor | 1 |
| CDH1 | Exon 2 | c.67C>T | p.Gln23* | Nonsense | 1 |
| CHEK2 | Exon 4 | c.499G>A | p.Gly167Arg | Missense | 5 |
| CHEK2 | Exon 4 | c.470T>C | p.Ile157Thr | Missense | 3 |
| CHEK2 | Exon 4 | c.591del | p.Val198Phefs*7 | Deletion/fs | 1 |
| CHEK2 | Exons 10 | Exon 10-14 Deletions | NA | In-frame deletion of the genomic region | 1 |
| CHEK2 | Intron 2 | c.320-1G>T | NA | Splice acceptor | 1 |
| CHEK2 | Intron 7 | c.846+2T>G | NA | Splice donor | 1 |
| EPCAM | Exons 8 | Exon 8-9 Deletion | NA | Gross deletion | 1 |
| MSH3 | Exon 15 | c.2179C>T | p.Arg727* | Nonsense | 1 |
| MSH6 | Exon 4 | c.1359del | p.Gly454Alafs*27 | Deletion/fs | 1 |
| MSH6 | Exon 5 | c.3226C>T | p.Arg1076Cys | Missense | 1 |
| MSH6 | Exon 9 | c.3929_3938del | p.Glu1310Valfs*14 | Deletion/fs | 1 |
| MSH6 | Exon5 c | c.3227G>A | p.Arg1076His | Missense | 1 |
| MUTYH (carrier) | Exon 13 | c.1187G>A | p.Gly396Asp | Missense | 2 |
| MUTYH (carrier) | Exon 9 | c.734G>A | p.Arg245His | Missense | 1 |
| NBN (carrier) | Exon 4 | c.429G>A | p.Trp143* | Nonsense | 2 |
| NF1 | Exon 13 | c.1466A>G | p.Tyr489Cys | Missense | 1 |
| NF1 | Exon 14 | c.1541_1542del | p.Gln514Argfs*43 | Deletion/fs | 1 |
| NF1 | Exon 25 | c.3306dup | p.Phe1103Ilefs*3 | Duplication/fs | 1 |
| NF1 | Exon 34 | c.4537C>T | p.Arg1513* | Nonsense | 1 |
| PALB2 | Exon 13 | c.3425del | p.Leu1142Tyrfs*21 | Deletion/fs | 1 |
| PALB2 | Exon 3 | c.178C>T | p.Gln60* | Nonsense | 1 |
| PALB2 | Exon 4 | c.1671_1674del | p.Ile558Lysfs*2 | Deletion/fs | 1 |
| PALB2 | Exon 4 | c.682C>T | p.Gln228* | Nonsense | 1 |
| PALB2 | Exon 5 | c.2257C>T | p.Arg753* | Nonsense | 1 |
| PALB2 | Exon 5 | c.2328del | p.Phe776Leufs*75 | Deletion/fs | 3 |
| PALB2 | Exon 7 | c.2728del | p.Tyr910Ilefs*13 | Deletion/fs | 2 |
| PMS2 | Exon 1 | c.3G>T | p.Met1? | Unknown*** | 1 |
| RAD51C | Exon 2 | c.181_182del | p.Leu61Alafs*11 | Deletion/fs | 2 |
| RAD51D | Exon 8 | c.694C>T | p.Arg232* | Nonsense | 1 |
| RAD51D | Intron 5 | c.481-1G>A | NA | Splice acceptor | 2 |
| RECQL4 | Exon 9 | c.1561del | p.Arg521Glyfs*37 | Deletion/fs | 1 |
| TP53 | Exon 5 | c.541C>T | p.Arg181Cys | Missense | 11 |
| TP53 | Exon 7 | c.725G>A | p.Cys242Tyr | Missense | 1 |
| TP53 | Exon 8 | c.818G>A | p.Arg273His | Missense | 1 |
| TP53 | Intron 8 | c.919+1G>C | NA | Splice donor | 1 |
| WRN | Exon 2 | c.15del | p.Lys5Asnfs*15 | Deletion/fs | 1 |
| WRN | Intron 10 | c.1351-2A>G | NA | Splice acceptor | 1 |

Two other variants of *APC* Exon 16 c.3920T>A (p.Ile1307Lys) were present concurrently with two patients having a *CHEK2* mutation in c.499G>A (p.Gly167Arg)

***"The consequence, at the protein level, of a variant affecting the translation initiation codon can’t be predicted (i.e., is unknown). Ref:https://varnomen.hgvs.org/recommendations/protein/variant/substitution/
